# Supplementary material for: Immunological effects of shift work in healthcare workers
Source: PubMed Central journal article supplement (PMC6890754; doi:10.1038/s41598-019-54816-5), 2019-12-03
Supplement: 41598_2019_54816_MOESM1_ESM.pdf [file 41598_2019_54816_MOESM1_ESM.pdf]

## **Supplementary information**

### **Immunological effects of shift work in healthcare workers**

Bette Loef, Nening M Nanlohy, Ronald H J Jacobi, Chantal van de Ven, Rob Mariman, Allard J van der Beek, Karin I Proper, and Debbie van Baarle

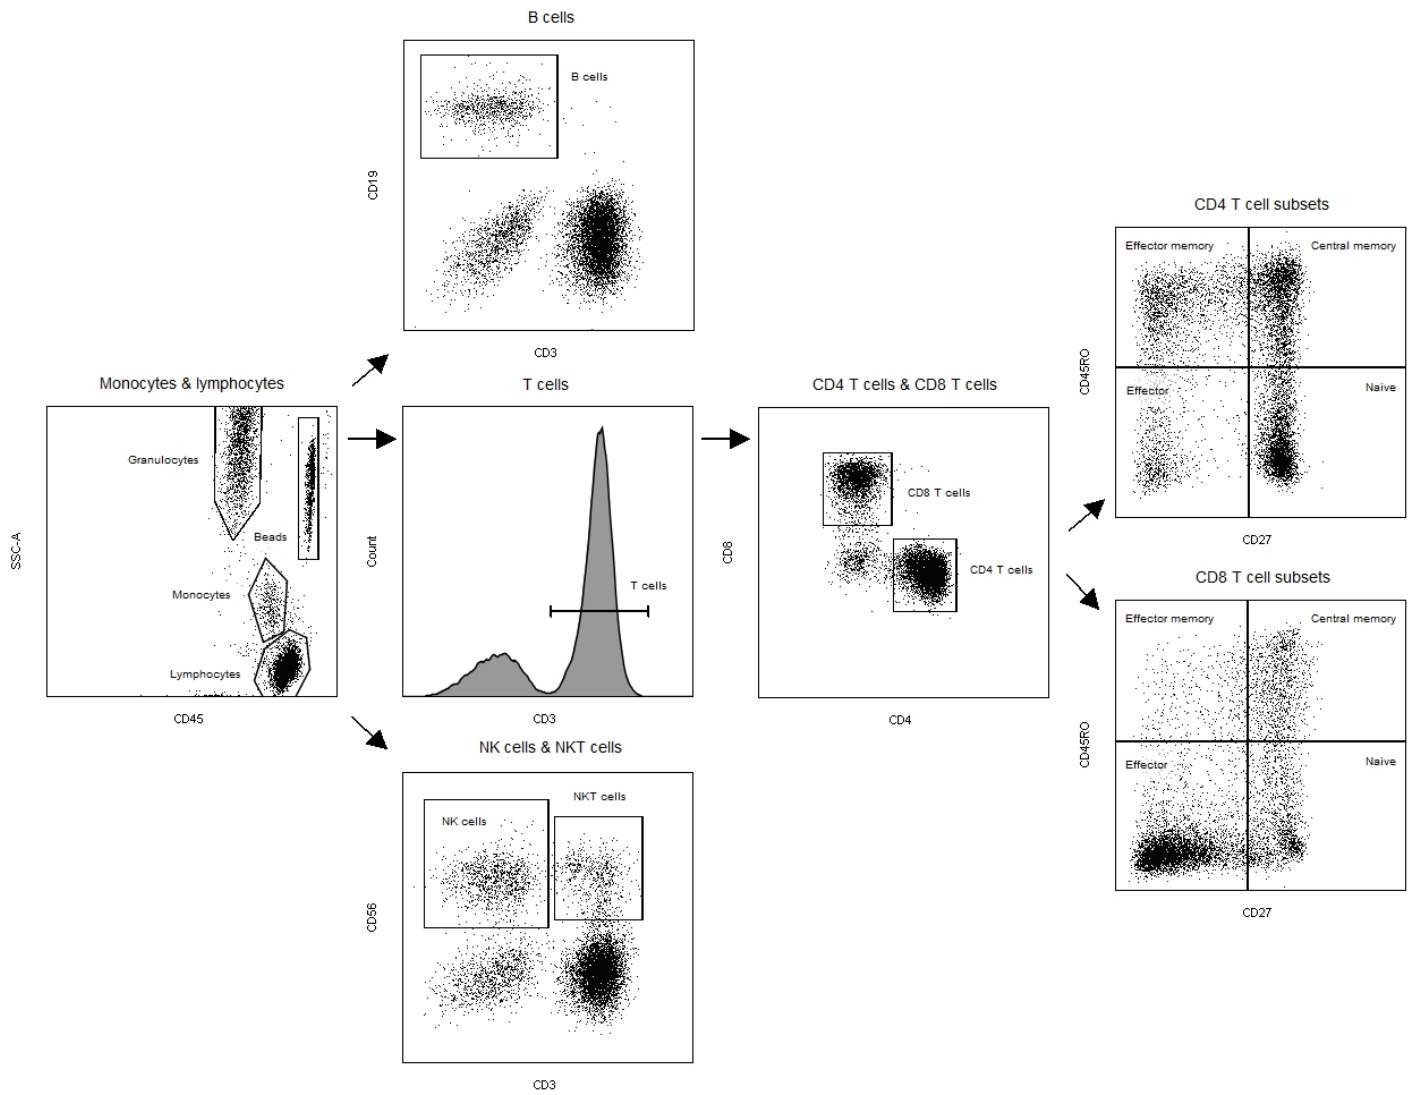

**Supplementary Figure S1.** Gating strategy used to determine numbers of immune cells.

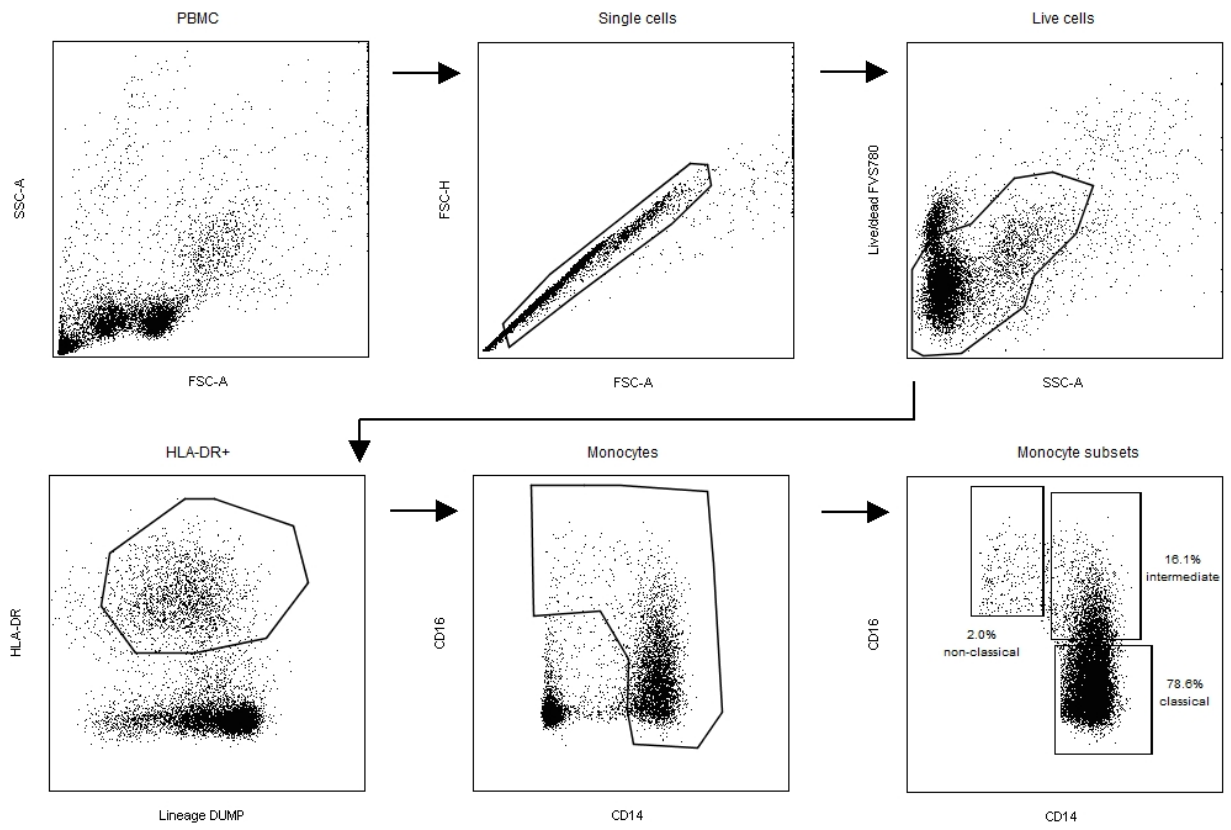

**Supplementary Figure S2.** Gating strategy used to determine monocyte subsets.

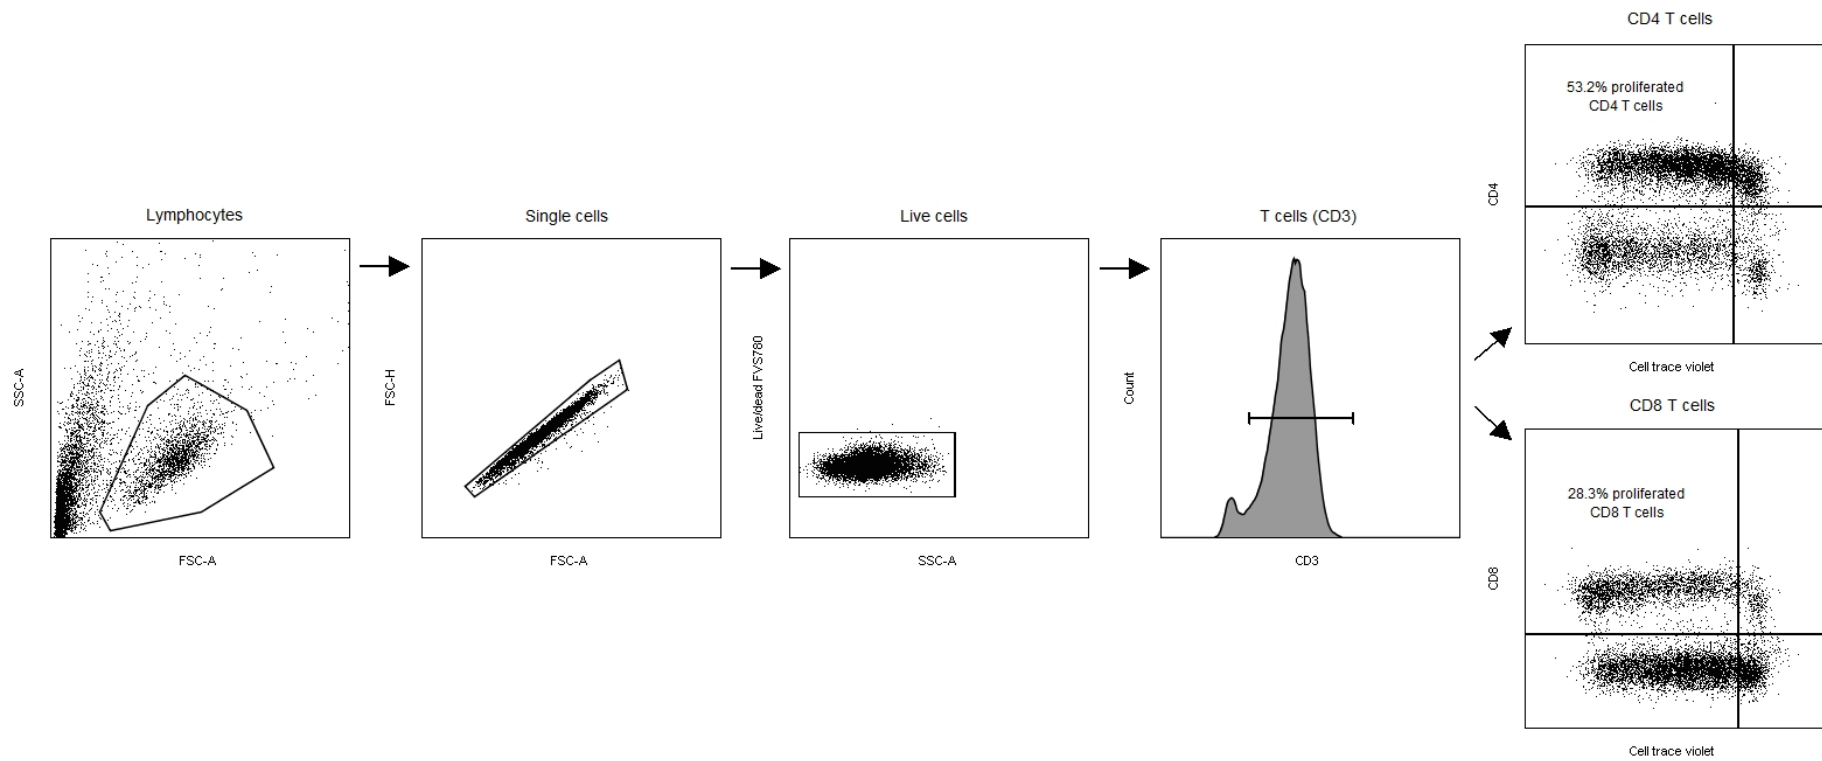

**Supplementary Figure S3.** Gating strategy used to determine CD4 and CD8 T cell proliferation. The example depicts the proliferative response of a participant to  $\alpha$ CD3 $\alpha$ CD28.

**Supplementary Table S1.** Effect estimates of the differences in immune cell counts in blood by frequency of night shifts and duration of night-shift work, compared to non-shift workers

|                             | Frequency of night shifts                                            |                                                                       |                                                                     | Duration of night-shift work                            |                                                           |                                                          |
|-----------------------------|----------------------------------------------------------------------|-----------------------------------------------------------------------|---------------------------------------------------------------------|---------------------------------------------------------|-----------------------------------------------------------|----------------------------------------------------------|
|                             | 1–2 night shifts/month<br>(n=44)<br><i>B</i> (95%-CI) <sup>a,b</sup> | 3–4 night shifts/month<br>(n=120)<br><i>B</i> (95%-CI) <sup>a,b</sup> | ≥5 night shifts/month<br>(n=90)<br><i>B</i> (95%-CI) <sup>a,b</sup> | <10 years<br>(n=84)<br><i>B</i> (95%-CI) <sup>a,b</sup> | 10–19 years<br>(n=62)<br><i>B</i> (95%-CI) <sup>a,b</sup> | ≥20 years<br>(n=108)<br><i>B</i> (95%-CI) <sup>a,b</sup> |
| Cells/ $\mu$ l blood        |                                                                      |                                                                       |                                                                     |                                                         |                                                           |                                                          |
| Monocytes                   | 1.17* (1.04 – 1.32)                                                  | 1.14* (1.03 – 1.26)                                                   | 1.15* (1.03 – 1.28)                                                 | 1.15* (1.01 – 1.30)                                     | 1.16* (1.03 – 1.29)                                       | 1.15* (1.04 – 1.28)                                      |
| Granulocytes                | 1.04 (0.90 – 1.19)                                                   | 1.06 (0.93 – 1.19)                                                    | 1.02 (0.90 – 1.16)                                                  | 1.05 (0.90 – 1.21)                                      | 1.04 (0.91 – 1.20)                                        | 1.03 (0.91 – 1.17)                                       |
| Lymphocytes                 | 1.03 (0.93 – 1.16)                                                   | 1.02 (0.92 – 1.12)                                                    | 1.08 (0.97 – 1.19)                                                  | 1.08 (0.96 – 1.22)                                      | 1.07 (0.96 – 1.19)                                        | 1.01 (0.91 – 1.11)                                       |
| NK cells                    | 0.84 (0.69 – 1.02)                                                   | 0.92 (0.77 – 1.09)                                                    | 0.92 (0.77 – 1.11)                                                  | 0.84 (0.68 – 1.04)                                      | 0.93 (0.77 – 1.13)                                        | 0.90 (0.76 – 1.08)                                       |
| NKT cells                   | 1.06 (0.79 – 1.43)                                                   | 1.06 (0.82 – 1.38)                                                    | 0.97 (0.74 – 1.28)                                                  | 1.09 (0.80 – 1.50)                                      | 1.09 (0.82 – 1.45)                                        | 0.98 (0.75 – 1.28)                                       |
| B cells                     | 1.06 (0.89 – 1.28)                                                   | 1.01 (0.86 – 1.18)                                                    | 1.10 (0.93 – 1.30)                                                  | 1.08 (0.89 – 1.32)                                      | 1.08 (0.90 – 1.29)                                        | 1.02 (0.87 – 1.21)                                       |
| T cells                     | 1.06 (0.94 – 1.20)                                                   | 1.03 (0.92 – 1.14)                                                    | 1.09 (0.97 – 1.22)                                                  | 1.10 (0.97 – 1.25)                                      | 1.09 (0.97 – 1.23)                                        | 1.02 (0.91 – 1.13)                                       |
| CD4 T cells                 | 1.03 (0.91 – 1.18)                                                   | 0.99 (0.88 – 1.11)                                                    | 1.03 (0.92 – 1.17)                                                  | 1.06 (0.92 – 1.22)                                      | 1.04 (0.92 – 1.19)                                        | 0.98 (0.87 – 1.10)                                       |
| CD4 effector memory T cells | 1.18 (0.99 – 1.413)                                                  | 1.00 (0.86 – 1.17)                                                    | 1.08 (0.92 – 1.27)                                                  | 1.12 (0.93 – 1.36)                                      | 1.14 (0.96 – 1.35)                                        | 1.03 (0.88 – 1.20)                                       |
| CD4 central memory T cells  | 1.10 (0.96 – 1.26)                                                   | 1.00 (0.88 – 1.12)                                                    | 1.03 (0.91 – 1.16)                                                  | 1.02 (0.88 – 1.18)                                      | 1.11 (0.98 – 1.27)                                        | 1.01 (0.89 – 1.14)                                       |
| CD4 naive T cells           | 0.92 (0.75 – 1.12)                                                   | 0.98 (0.82 – 1.17)                                                    | 1.01 (0.84 – 1.22)                                                  | 1.08 (0.87 – 1.34)                                      | 0.95 (0.78 – 1.15)                                        | 0.93 (0.78 – 1.12)                                       |
| CD4 effector T cells        | 0.93 (0.64 – 1.34)                                                   | 0.76 (0.55 – 1.06)                                                    | 0.88 (0.63 – 1.24)                                                  | 1.14 (0.77 – 1.70)                                      | 0.95 (0.67 – 1.36)                                        | 0.69* (0.50 – 0.96)                                      |
| CD8 T cells                 | 1.14 (0.97 – 1.34)                                                   | 1.09 (0.94 – 1.25)                                                    | 1.20* (1.04 – 1.40)                                                 | 1.19 (1.00 – 1.41)                                      | 1.21* (1.04 – 1.42)                                       | 1.08 (0.93 – 1.25)                                       |
| CD8 effector memory T cells | 1.26 (0.95 – 1.67)                                                   | 1.11 (0.87 – 1.42)                                                    | 1.25 (0.97 – 1.62)                                                  | 1.16 (0.86 – 1.57)                                      | 1.34* (1.02 – 1.75)                                       | 1.16 (0.90 – 1.49)                                       |
| CD8 central memory T cells  | 1.31* (1.07 – 1.62)                                                  | 1.11 (0.92 – 1.33)                                                    | 1.12 (0.92 – 1.36)                                                  | 1.13 (0.90 – 1.42)                                      | 1.32* (1.08 – 1.62)                                       | 1.12 (0.93 – 1.35)                                       |
| CD8 naive T cells           | 1.03 (0.85 – 1.26)                                                   | 1.01 (0.85 – 1.20)                                                    | 1.21* (1.01 – 1.45)                                                 | 1.18 (0.95 – 1.46)                                      | 1.11 (0.91 – 1.34)                                        | 1.02 (0.85 – 1.22)                                       |
| CD8 effector T cells        | 1.15 (0.86 – 1.54)                                                   | 0.94 (0.73 – 1.21)                                                    | 0.99 (0.76 – 1.29)                                                  | 1.00 (0.73 – 1.36)                                      | 1.12 (0.84 – 1.48)                                        | 0.98 (0.75 – 1.26)                                       |
| CD4/CD8 T cell ratio        | 0.91 (0.78 – 1.06)                                                   | 0.92 (0.80 – 1.05)                                                    | 0.86* (0.75 – 1.00)                                                 | 0.90 (0.77 – 1.06)                                      | 0.87 (0.75 – 1.01)                                        | 0.92 (0.80 – 1.05)                                       |

Reference group: non-shift workers.

*B*, regression coefficient; CI, confidence interval. T cell subsets: Effector memory T cells: CD27-/CD45RO+, Central memory T cells: CD27+/CD45RO+, Naive T cells: CD27+/CD45RO-, Effector T cells: CD27-/CD45RO-.

\* Statistically significant difference ( $p < 0.05$ ) between night-shift workers and non-shift workers tested using linear regression analysis for the log-transformed outcomes.

<sup>a</sup> The regression coefficients are ratios between geometric means of night-shift workers and non-shift workers.

<sup>b</sup> Adjusted for age, gender, CMV status, occupation, educational level, general perceived health, smoking status, influenza vaccination status, and recent infection.

**Supplementary Table S2.** Effect estimates of the differences in immune cell counts in blood by chronotype of night-shift workers, compared to non-shift workers

|                             | Chronotype of night-shift workers                                                              |                                                                                                 |                                                                                                     |
|-----------------------------|------------------------------------------------------------------------------------------------|-------------------------------------------------------------------------------------------------|-----------------------------------------------------------------------------------------------------|
|                             | Night-shift workers<br>with morning<br>chronotype<br>(n=87)<br><i>B (95%-CI)<sup>a,b</sup></i> | Night-shift workers<br>with evening<br>chronotype<br>(n=107)<br><i>B (95%-CI)<sup>a,b</sup></i> | Night-shift workers<br>with intermediate<br>chronotype<br>(n=60)<br><i>B (95%-CI)<sup>a,b</sup></i> |
| Cells/ $\mu$ l blood        |                                                                                                |                                                                                                 |                                                                                                     |
| Monocytes                   | 1.16* (1.04 – 1.29)                                                                            | 1.14* (1.03 – 1.26)                                                                             | 1.16* (1.04 – 1.30)                                                                                 |
| Granulocytes                | 1.00 (0.89 – 1.14)                                                                             | 1.08 (0.95 – 1.22)                                                                              | 1.03 (0.90 – 1.18)                                                                                  |
| Lymphocytes                 | 1.00 (0.91 – 1.11)                                                                             | 1.08 (0.98 – 1.19)                                                                              | 1.04 (0.93 – 1.15)                                                                                  |
| NK cells                    | 0.83* (0.69 – 0.98)                                                                            | 0.92 (0.77 – 1.10)                                                                              | 0.96 (0.80 – 1.17)                                                                                  |
| NKT cells                   | 0.98 (0.75 – 1.28)                                                                             | 1.07 (0.82 – 1.39)                                                                              | 1.06 (0.79 – 1.41)                                                                                  |
| B cells                     | 0.99 (0.84 – 1.17)                                                                             | 1.13 (0.97 – 1.33)                                                                              | 1.01 (0.85 – 1.21)                                                                                  |
| T cells                     | 1.02 (0.91 – 1.14)                                                                             | 1.09 (0.98 – 1.21)                                                                              | 1.05 (0.93 – 1.18)                                                                                  |
| CD4 T cells                 | 0.98 (0.87 – 1.11)                                                                             | 1.06 (0.94 – 1.19)                                                                              | 0.99 (0.87 – 1.13)                                                                                  |
| CD4 effector memory T cells | 1.10 (0.94 – 1.28)                                                                             | 1.06 (0.91 – 1.23)                                                                              | 1.08 (0.92 – 1.28)                                                                                  |
| CD4 central memory T cells  | 1.02 (0.91 – 1.15)                                                                             | 1.08 (0.96 – 1.22)                                                                              | 0.97 (0.86 – 1.11)                                                                                  |
| CD4 naive T cells           | 0.91 (0.76 – 1.09)                                                                             | 1.03 (0.87 – 1.23)                                                                              | 0.95 (0.78 – 1.15)                                                                                  |
| CD4 effector T cells        | 0.95 (0.68 – 1.32)                                                                             | 0.75 (0.54 – 1.03)                                                                              | 0.88 (0.62 – 1.26)                                                                                  |
| CD8 T cells                 | 1.08 (0.93 – 1.25)                                                                             | 1.16* (1.01 – 1.34)                                                                             | 1.18* (1.01 – 1.38)                                                                                 |
| CD8 effector memory T cells | 1.12 (0.87 – 1.44)                                                                             | 1.24 (0.97 – 1.59)                                                                              | 1.24 (0.95 – 1.63)                                                                                  |
| CD8 central memory T cells  | 1.08 (0.89 – 1.30)                                                                             | 1.23* (1.02 – 1.47)                                                                             | 1.20 (0.98 – 1.48)                                                                                  |
| CD8 naive T cells           | 1.02 (0.85 – 1.22)                                                                             | 1.12 (0.94 – 1.33)                                                                              | 1.09 (0.90 – 1.32)                                                                                  |
| CD8 effector T cells        | 1.02 (0.78 – 1.32)                                                                             | 0.99 (0.77 – 1.28)                                                                              | 1.06 (0.80 – 1.40)                                                                                  |
| CD4/CD8 T cell ratio        | 0.92 (0.80 – 1.05)                                                                             | 0.92 (0.80 – 1.05)                                                                              | 0.84* (0.73 – 0.97)                                                                                 |

Reference group: non-shift workers.

B, regression coefficient; CI, confidence interval; IQR, interquartile range; SD, standard deviation.

T cell subsets: Effector memory T cells: CD27-/CD45RO+, Central memory T cells: CD27+/CD45RO+, Naive T cells: CD27+/CD45RO-, Effector T cells: CD27-/CD45RO-.

\* Statistically significant difference ( $p < 0.05$ ) between night-shift workers and non-shift workers tested using linear regression analysis for the log-transformed outcomes.

<sup>a</sup> The regression coefficients are ratios between geometric means of night-shift workers and non-shift workers.

<sup>b</sup> Adjusted for age, gender, CMV status, occupation, educational level, general perceived health, smoking status, influenza vaccination status, and recent infection.

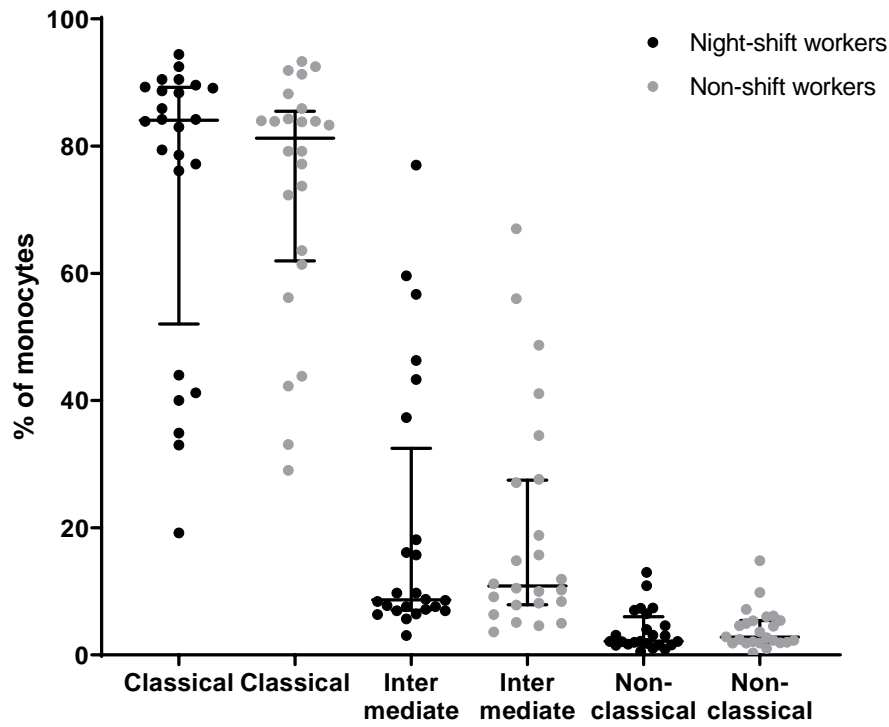

**Supplementary Figure S4.** Percentages of monocyte subsets (i.e. classical, intermediate, non-classical) in 24 night-shift workers (black) and 24 non-shift workers (grey) matched on age, gender, and CMV status.

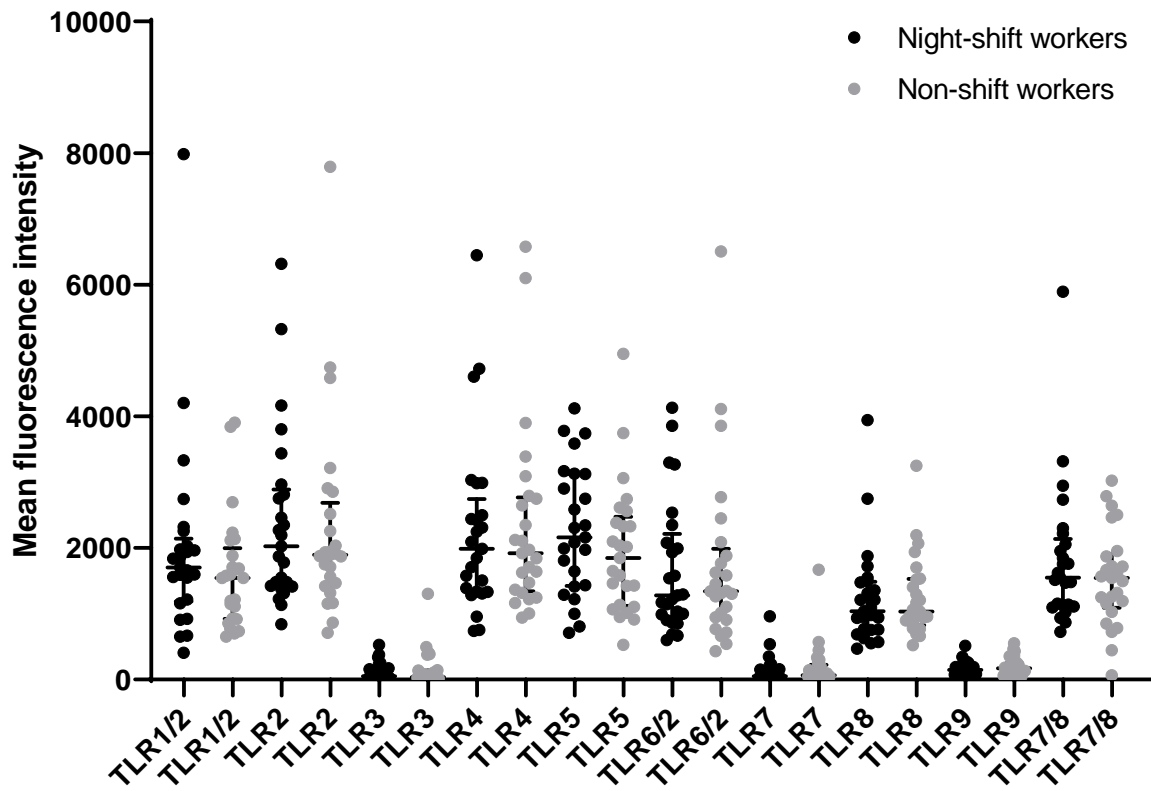

**Supplementary Figure S5.** Mean fluorescence intensity of IL-6 after stimulation of PBMC with TLR ligands in 24 night-shift workers (black) and 24 non-shift workers (grey) matched on age, gender, and CMV status.



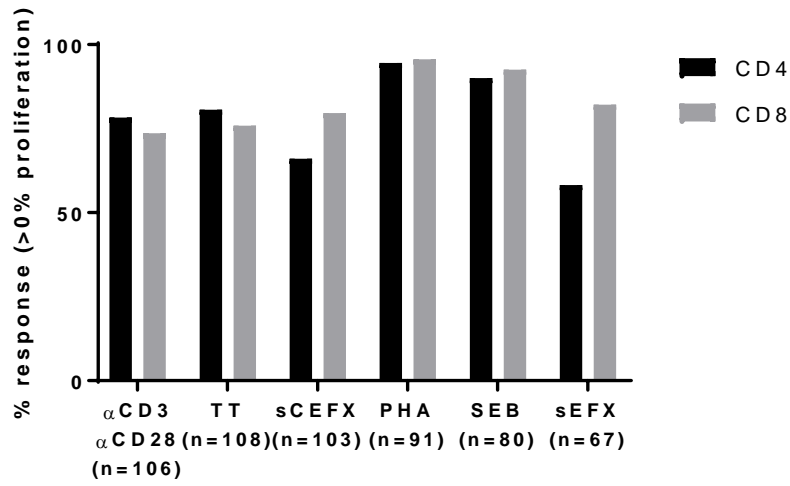

**Supplementary Figure S6.** Proportions of participants, irrespective of shift work status, who expressed CD4 T cell (black) and CD8 T cell (grey) proliferation as a response to the different stimuli (>0% stimulus-specific T cell proliferation).

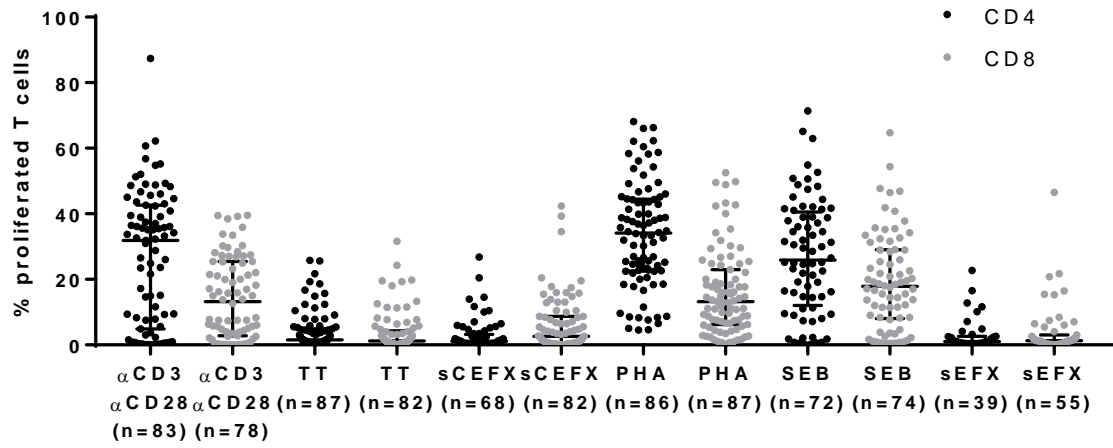

**Supplementary Figure S7.** Percentages proliferated CD4 T cells (black) and CD8 T cells (grey) among the responders (>0% stimulus-specific T cell proliferation), irrespective of shift work status.

**Supplementary Table S3.** Differences in concentration of cytokines measured in supernatant of PBMC stimulated with T-cell stimuli (after 1 and 6 days) between night-shift workers and non-shift workers

|              | Day 1                         |                             | Day 6                         |                             |
|--------------|-------------------------------|-----------------------------|-------------------------------|-----------------------------|
|              | Night shift workers<br>(n=42) | Non-shift workers<br>(n=42) | Night shift workers<br>(n=54) | Non-shift workers<br>(n=54) |
| <i>pg/ml</i> | <i>mean (SD); median</i>      | <i>mean (SD); median</i>    | <i>mean (SD); median</i>      | <i>mean (SD); median</i>    |
| IL-5         | 27.2 (67.0); 1.9              | 21.5 (47.3); 2.2            | 59.4 (85.9); 5.7              | 60.4 (123.1); 1.5           |
| IL-13        | 10.6 (16.7); 5.0              | 9.0 (12.5); 3.1             | 22.5 (27.4); 4.1              | 20.3 (34.9); 1.4            |
| IL-2         | 43.7 (74.5); 1.0              | 42.5 (68.9); 2.1            | 4.7 (17.6); 0.7               | 7.1 (21.3); 0.7             |
| IL-6         | 121.2 (170.8); 46.2           | 115.8 (180.1); 47.7         | 181.2 (261.6); 58.7           | 191.2 (357.3); 45.5         |
| IL-9         | 3.1 (6.4); 0.6                | 2.6 (6.6); 0.6              | 9.1 (14.0); 1.1               | 8.8 (16.3); 0.6             |
| IL-10        | 4.5 (8.0); 1.3                | 6.1 (13.1); 0.6             | 6.3 (11.0); 0.9               | 8.8 (16.4); 0.6             |
| IFN $\gamma$ | 511.5 (765.5); 116.1          | 485.4 (735.1); 153.4        | 879.6 (1356.0); 126.7         | 708.4 (1317.6); 41.1        |
| TNF $\alpha$ | 205.2 (348.3); 16.0           | 174.1 (285.9); 21.8         | 47.4 (82.3); 3.2              | 40.1 (73.2); 1.3            |
| IL-17A       | 5.9 (13.7); 1.2               | 5.9 (13.1); 1.4             | 17.5 (25.4); 2.7              | 23.2 (48.3); 0.7            |
| IL-17F       | 2.4 (7.5); 0.2                | 2.4 (6.8); 0.2              | 12.9 (20.9); 0.7              | 16.2 (38.6); 0.2            |
| IL-4         | 0.7 (0.6); 0.5                | 0.9 (0.8); 0.7              | 0.6 (0.4); 0.5                | 0.7 (0.9); 0.4              |
| IL-21        | 0.9 (0.3); 1.1                | 0.9 (0.3); 1.1              | 1.0 (0.3); 1.1                | 1.0 (0.6); 1.1              |
| IL-22        | 4.0 (7.5); 1.4                | 3.8 (6.3); 1.6              | 5.6 (9.4); 2.3                | 5.6 (16.0); 0.5             |

SD, standard deviation.

\* Statistically significant difference ( $p < 0.05$ ) between night shift workers and non-shift workers tested with the Mann-Whitney U test.
